# Supplementary material for: Letrozole treatment of adult female mice results in a similar reproductive phenotype but distinct changes in metabolism and the gut microbiome compared to pubertal mice
Source: PubMed Central journal article supplement (PMC6419356; doi:10.1186/s12866-019-1425-7), 2019-03-12

# FigureS1

A

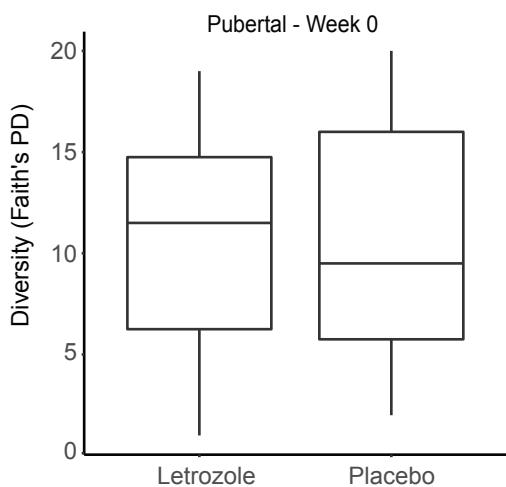

B

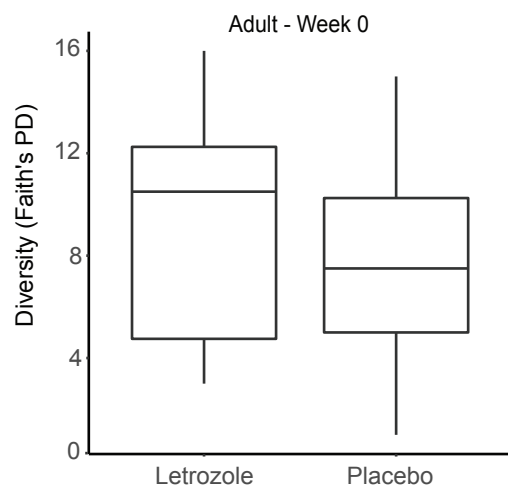

C

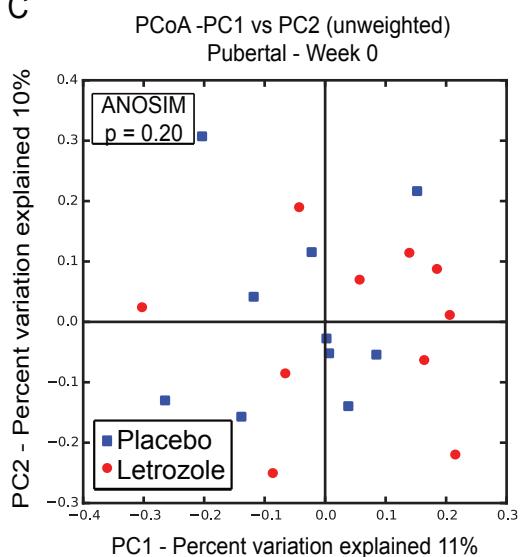

D

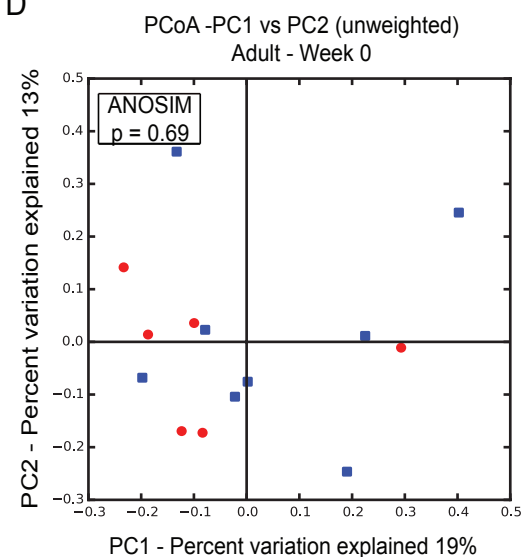

Supplement: 12866_2019_1425_MOESM1_ESM.pdf [file 12866_2019_1425_MOESM1_ESM.pdf]
